# Supplementary material for: Reduction and oxidation of poly(3,4-ethylenedioxythiophene):poly(styrenesulfonate) induced by methylamine (CH3NH2)-containing atmosphere for perovskite solar cells
Source: Royal Society of Chemistry journal article supplement (doi:10.1039/c6ta00488a), 2016-01-01

## Supporting Information

Reduction and oxidation of  
poly(3,4-ethylenedioxythiophene):poly(styrenesulfonate)  
induced by methylamine ( $\text{CH}_3\text{NH}_2$ )-containing atmosphere for  
perovskite solar cells

Tiefeng Liu, Fangyuan Jiang, Jinhui Tong, Fei Qin, Wei Meng, Youyu Jiang, Zaifang Li and  
Yinhua Zhou\*

*Wuhan National Laboratory for Optoelectronics, and School of Optical and Electronic  
Information, Huazhong University of Science and Technology, Wuhan 430074, China*

\*Corresponding author. E-mail: yh\_zhou@hust.edu.cn

**Table S1.** Device performance of TiO<sub>2</sub>-based and PEDOT:PSS-based perovskite solar cells with anti-solvent or MA-treatment to prepare the perovskite absorbers. (The data is averaged from 10 devices and the effective device area is 10.91 mm<sup>2</sup>)

| <b>Devices type</b>          | <b>treatment</b> | <b>V<sub>OC</sub>(V)</b> | <b>J<sub>SC</sub>(mA/cm<sup>2</sup>)</b> | <b>FF</b>  | <b>PCE(%)</b> |
|------------------------------|------------------|--------------------------|------------------------------------------|------------|---------------|
| <b>TiO<sub>2</sub>-based</b> | Anti-solvent     | 1.01 ±0.04               | 17.57 ±0.41                              | 0.64 ±0.03 | 11.33 ±0.45   |
|                              | MA-treatment     | 0.99 ±0.03               | 17.38 ±0.51                              | 0.63 ±0.04 | 11.03 ±0.41   |
| <b>PEDOT:PSS-based</b>       | Anti-solvent     | 0.81 ±0.03               | 16.44 ±0.67                              | 0.71 ±0.04 | 9.29 ±0.59    |
|                              | MA-treatment     | 0.60 ±0.05               | 4.73 ±1.27                               | 0.55 ±0.05 | 1.69 ±0.38    |

**Figure S1.** Device performance of perovskite solar cells with the structure of glass/ITO/PEDOT:PSS/perovskite/PCBM/PEI/Ag where the PEDOT:PSS films and perovskite films are treated in different ways.

| Devices sample          | Hole-transporting layer | The method of preparing perovskite layer |
|-------------------------|-------------------------|------------------------------------------|
| Device 1                | MA-treated PEDOT:PSS    | Anti-solvent                             |
| Device 2                | Untreated PEDOT:PSS     | MA-treatment                             |
| Device 3<br>(reference) | Untreated PEDOT:PSS     | Anti-solvent                             |

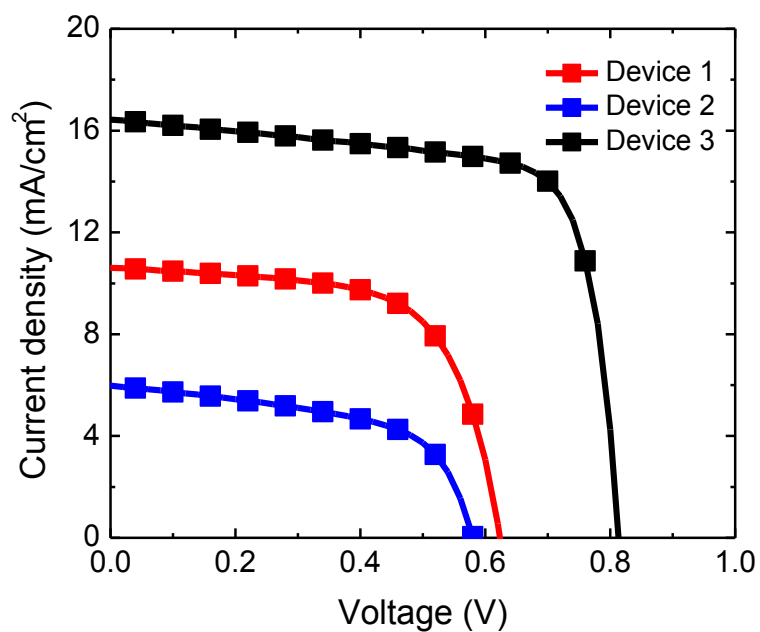

Supplement: c6ta00488a1.pdf [file c6ta00488a1.pdf]
